# Supplementary figures and images for: Influence of anion–water interactions on the behaviour of lipases in room temperature ionic liquids
Source: Royal Society of Chemistry journal article supplement (doi:10.1039/c4ra07460b), 2014-09-12

Supp 1: Root Mean Square Deviation of Protein's Main Chain fitted against initial structure

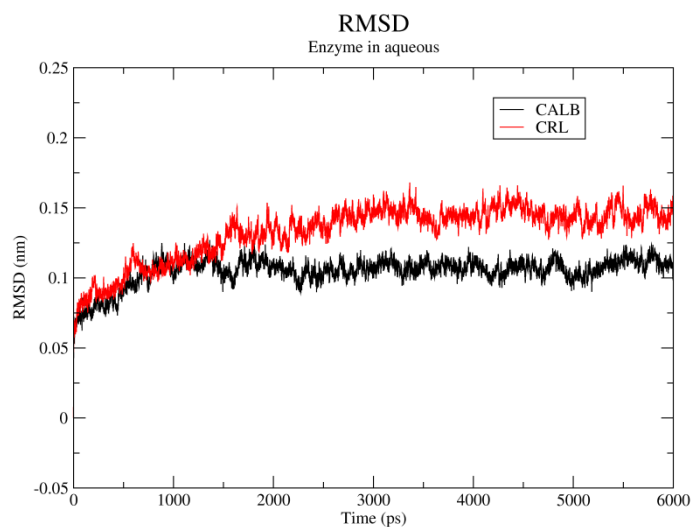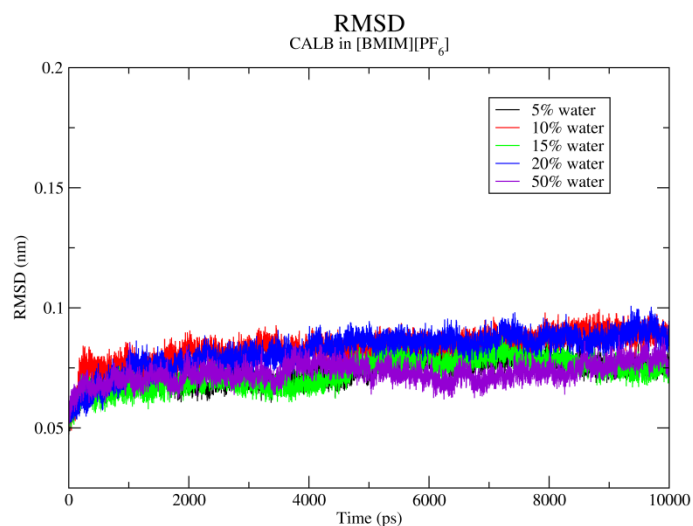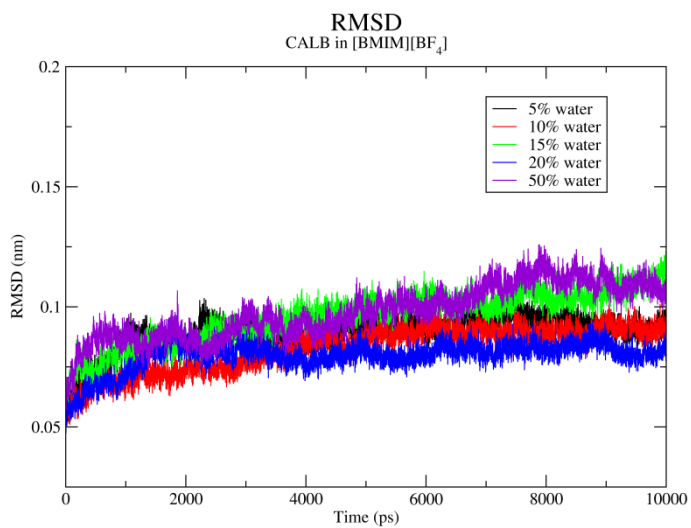

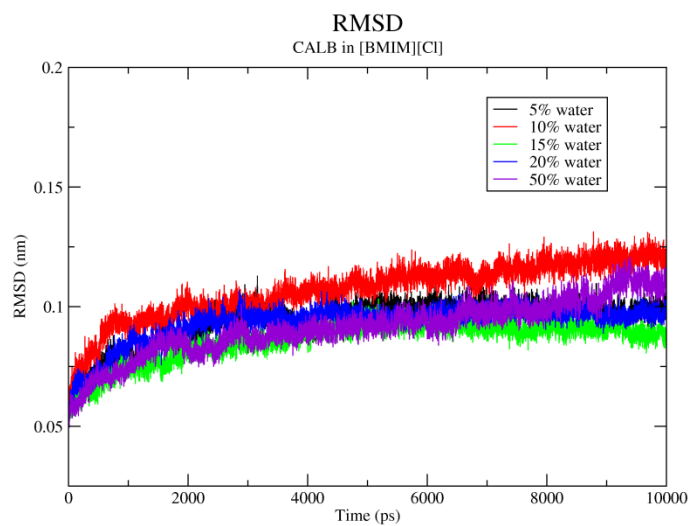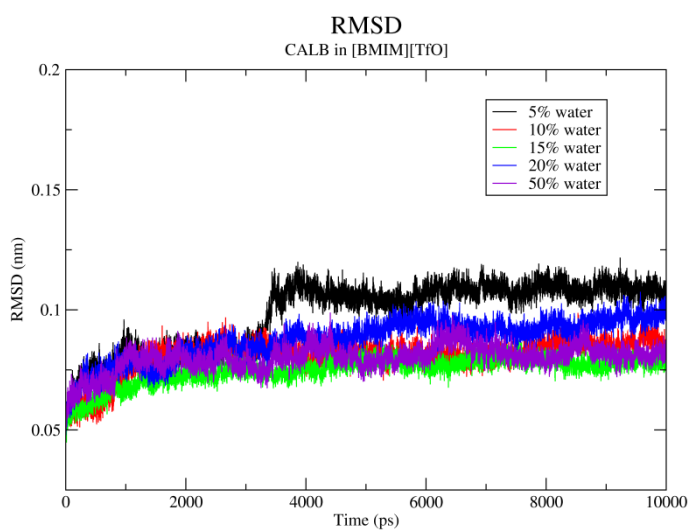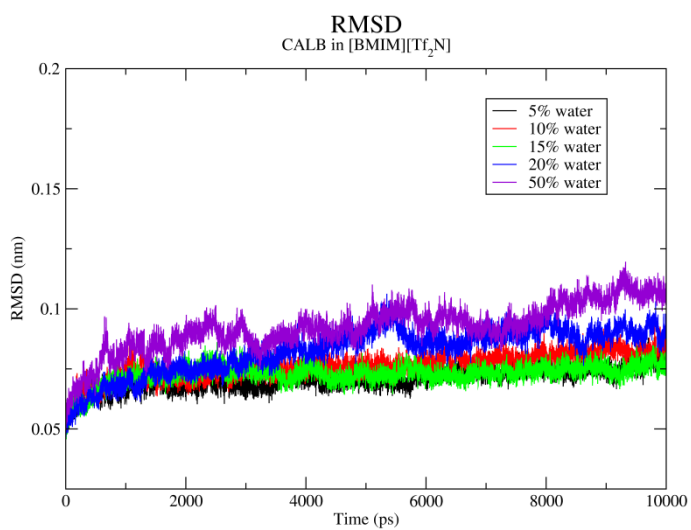

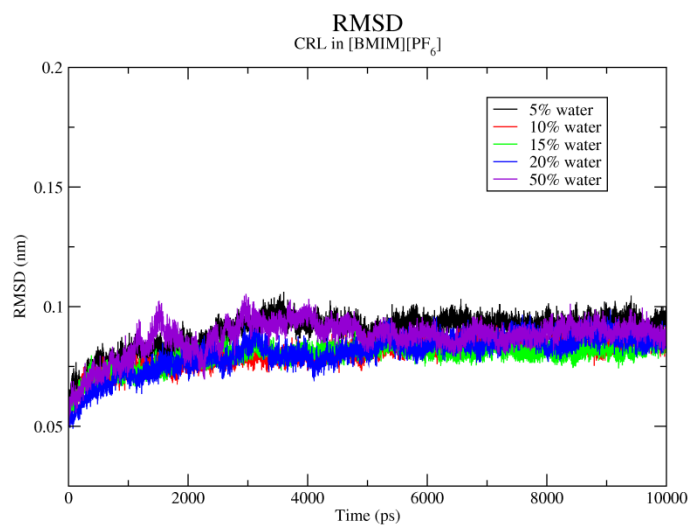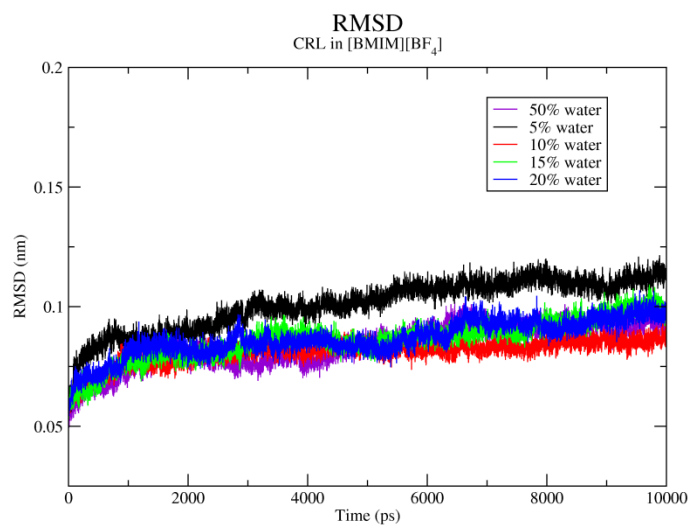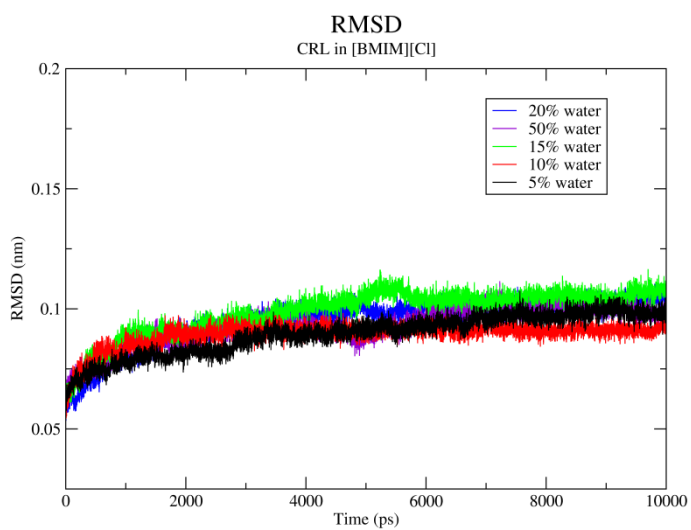

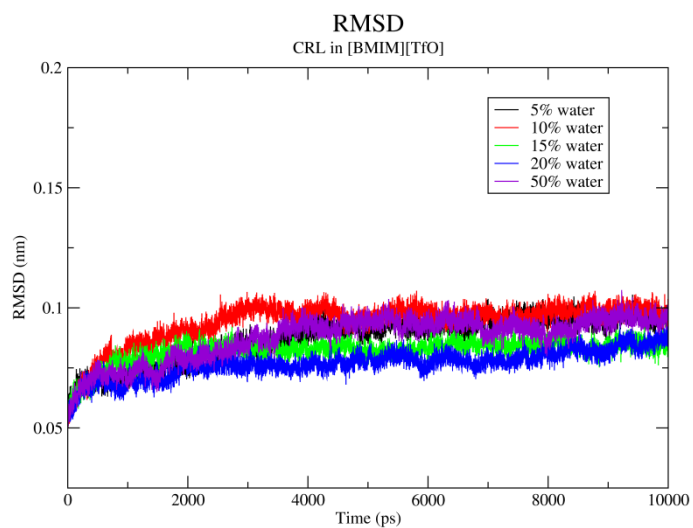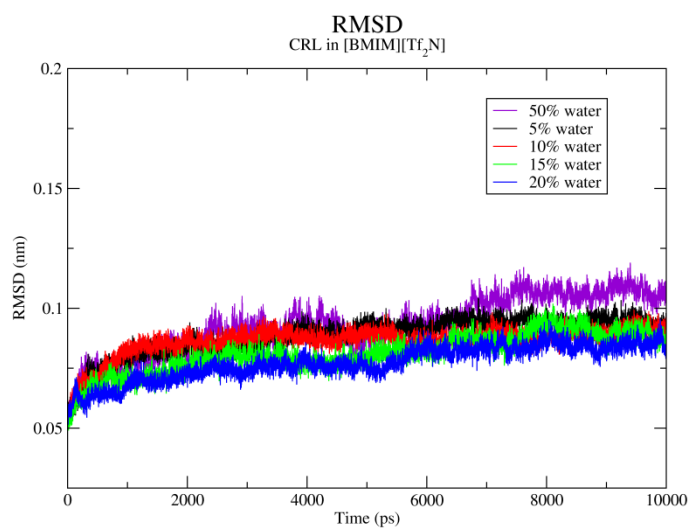

Supplement: c4ra07460b1.pdf [file c4ra07460b1.pdf]
